# Supplementary material
Source: PubMed Central journal article supplement (PMC3739041)
Supplement: supp_blood-2012-10-460998_blood-2012-10-460998-1.pdf [file supp_blood-2012-10-460998_blood-2012-10-460998-1.pdf]

## Supplemental data

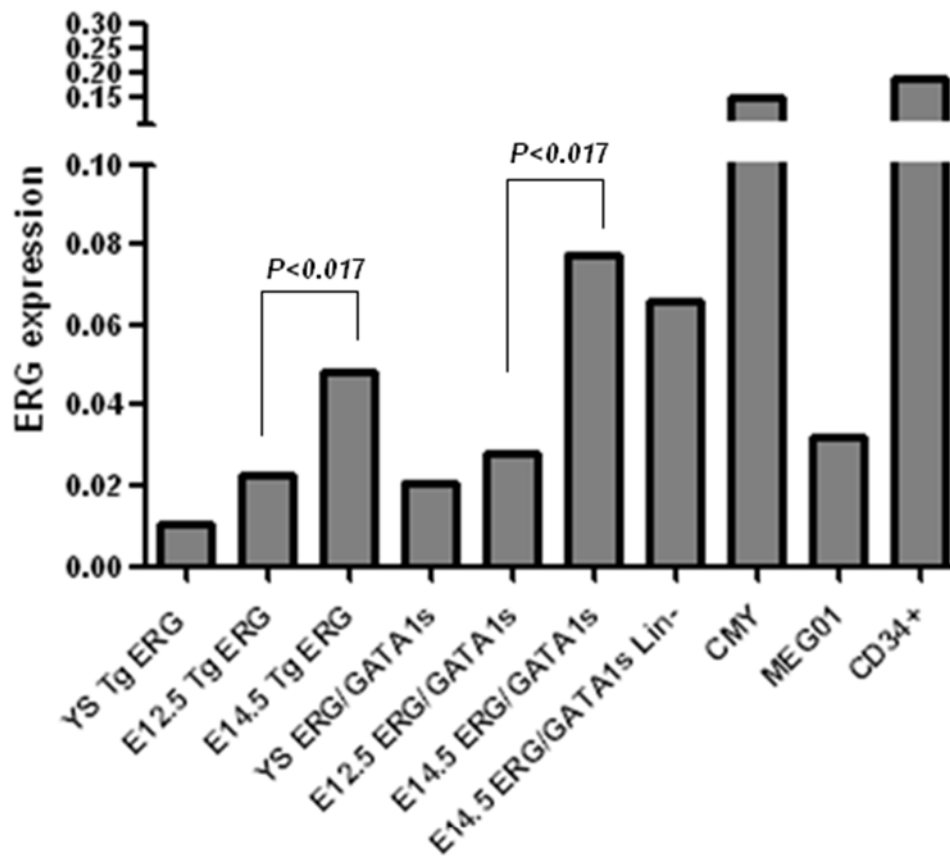

**Figure S1: Human ERG3 expression as measured by real time PCR.** ERG expression was measured from RNA extracted from FL at different embryonic stages, from *ERG/Gata1s* FL Lin<sup>-</sup> cells isolated using the lineage cell depletion kit (Miltenyi), from human CD34<sup>+</sup> cord blood cells and from AMKL cell lines. t-test  $p=0.017$  between E12.5 and E14.5 FL cells.

A.

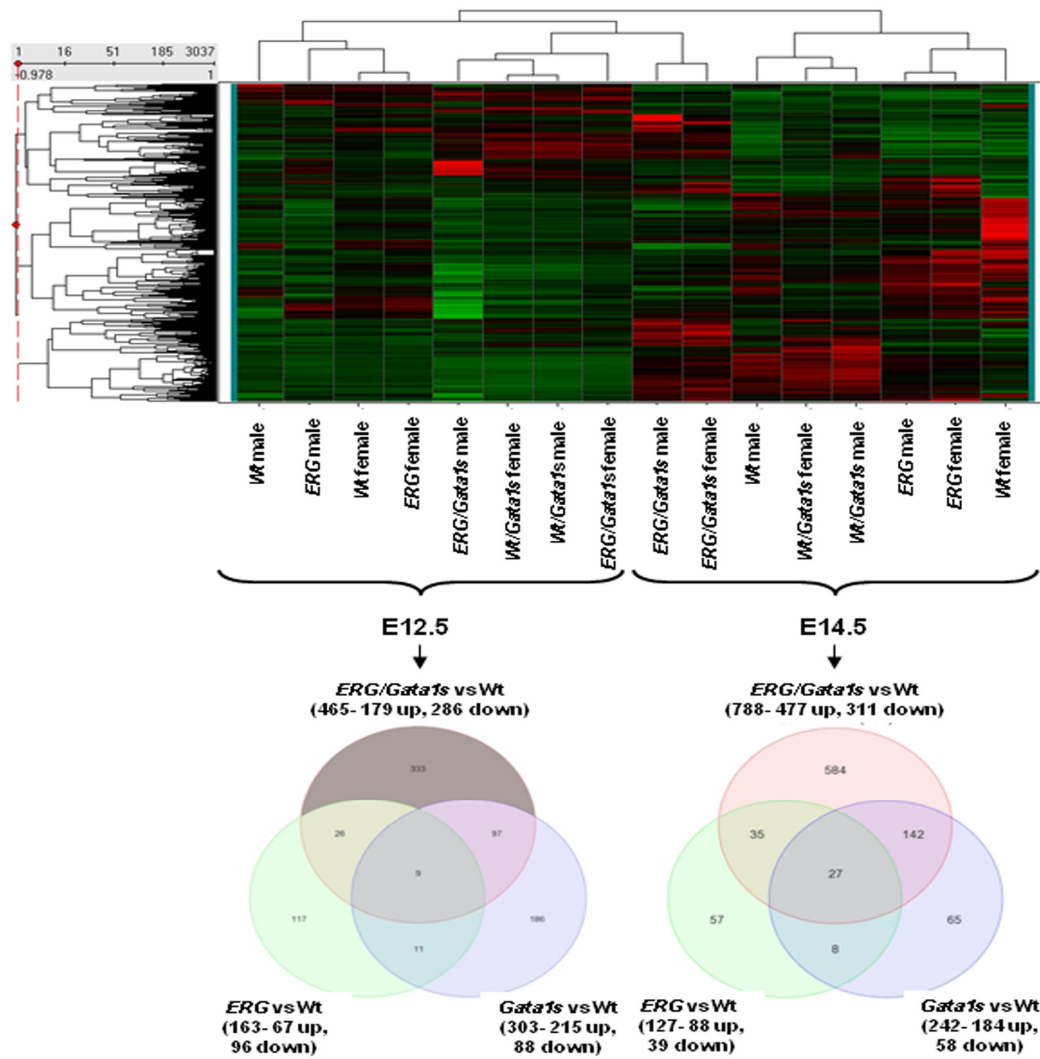

B.

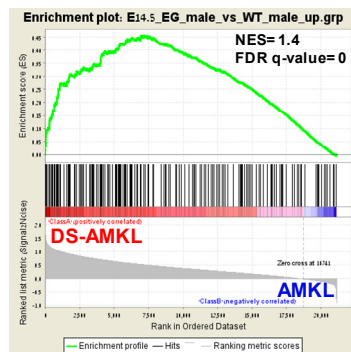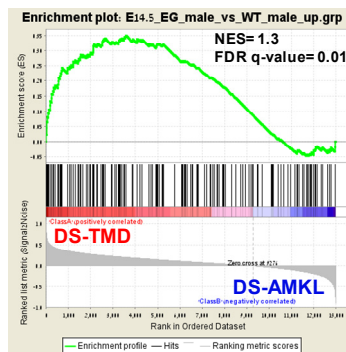

C.

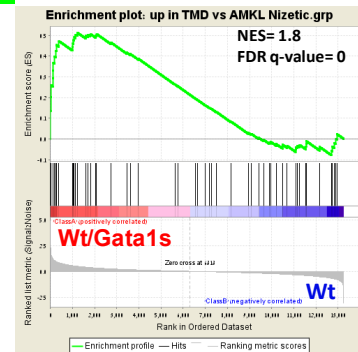

**Figure S2: (A) Analysis of gene expression data.** Upper panel- Heat map showing unsupervised clustering of the 16 FL samples, using the expression data corresponding to 3037 filtered genes. Lower panel- venn diagrams comparing differentially expressed genes in Tg *ERG*, *Gata1s* and *ERG/Gata1s* male FL cells (compared to the Wt control) in E12.5 and E14.5. **(B)** Gene Set Enrichment Analysis (GSEA) shows significant enrichment of *ERG/Gata1s* gene signature in DS-AMKL when compared to non DS-AMKL (GSE16677) and in DS-TMD when compared to DS-AMKL (GSE4119). NES (normalized enrichment score) and FDR (false detection rate) q values are shown. **(C)** GSEA shows significant enrichment of genes that were unregulated in E14.5 *Wt/Gata1s* FL cells compared to the respective Wt control with genes that were up regulated in human TMD (GSE4119). NES (normalized enrichment score) and FDR (false detection rate) q values are shown.

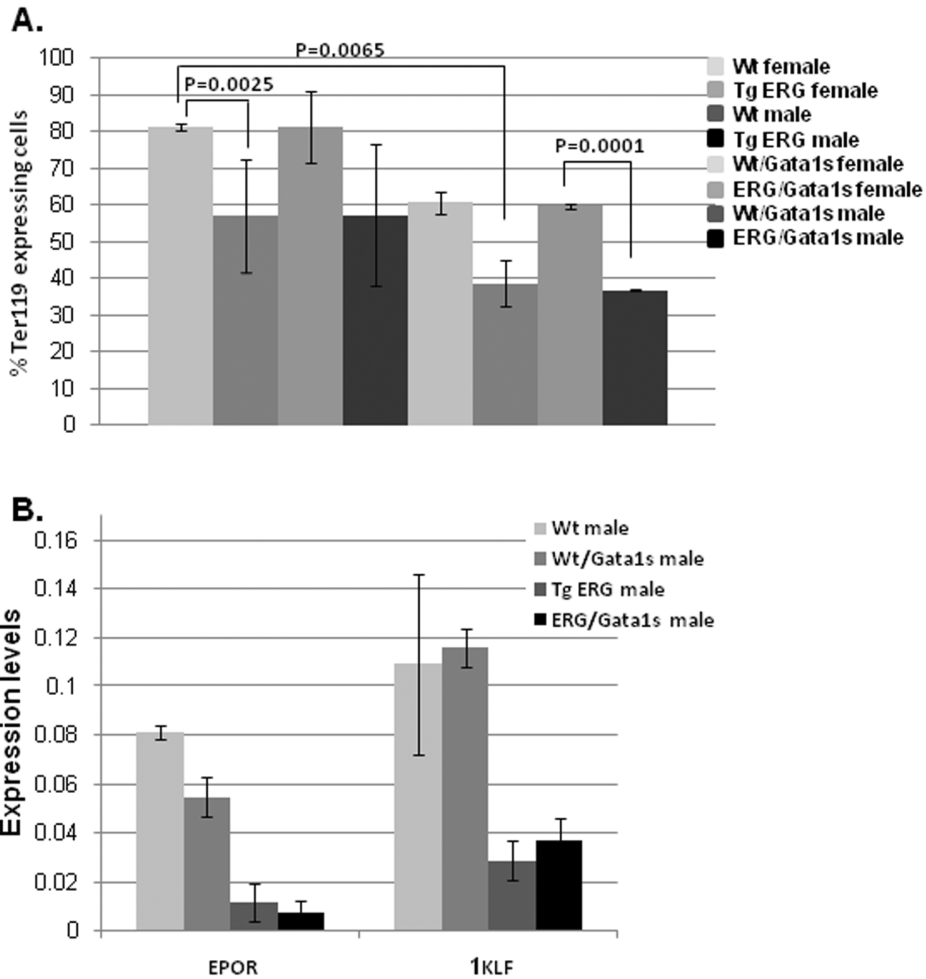

**Figure S3: (A) Ter119 expression in E14.5 FL cells.** Expression of Ter119 erythroid marker as measured by flow cytometry analysis in FL cells generated from E14.5 females and males *Wt*, *Tg ERG*, *Wt/Gata1s* and *ERG/Gata1s* animals. The bar graph represents an average of at least 4 experiments. Statistical significance was tested using *t-test*. **(B)** Expression of erythroid genes as measured by expression array and confirmed by real time PCR in E14.5 FL cells from *Wt*, *Tg ERG*, *Wt/Gata1s* and *ERG/Gata1s* males.

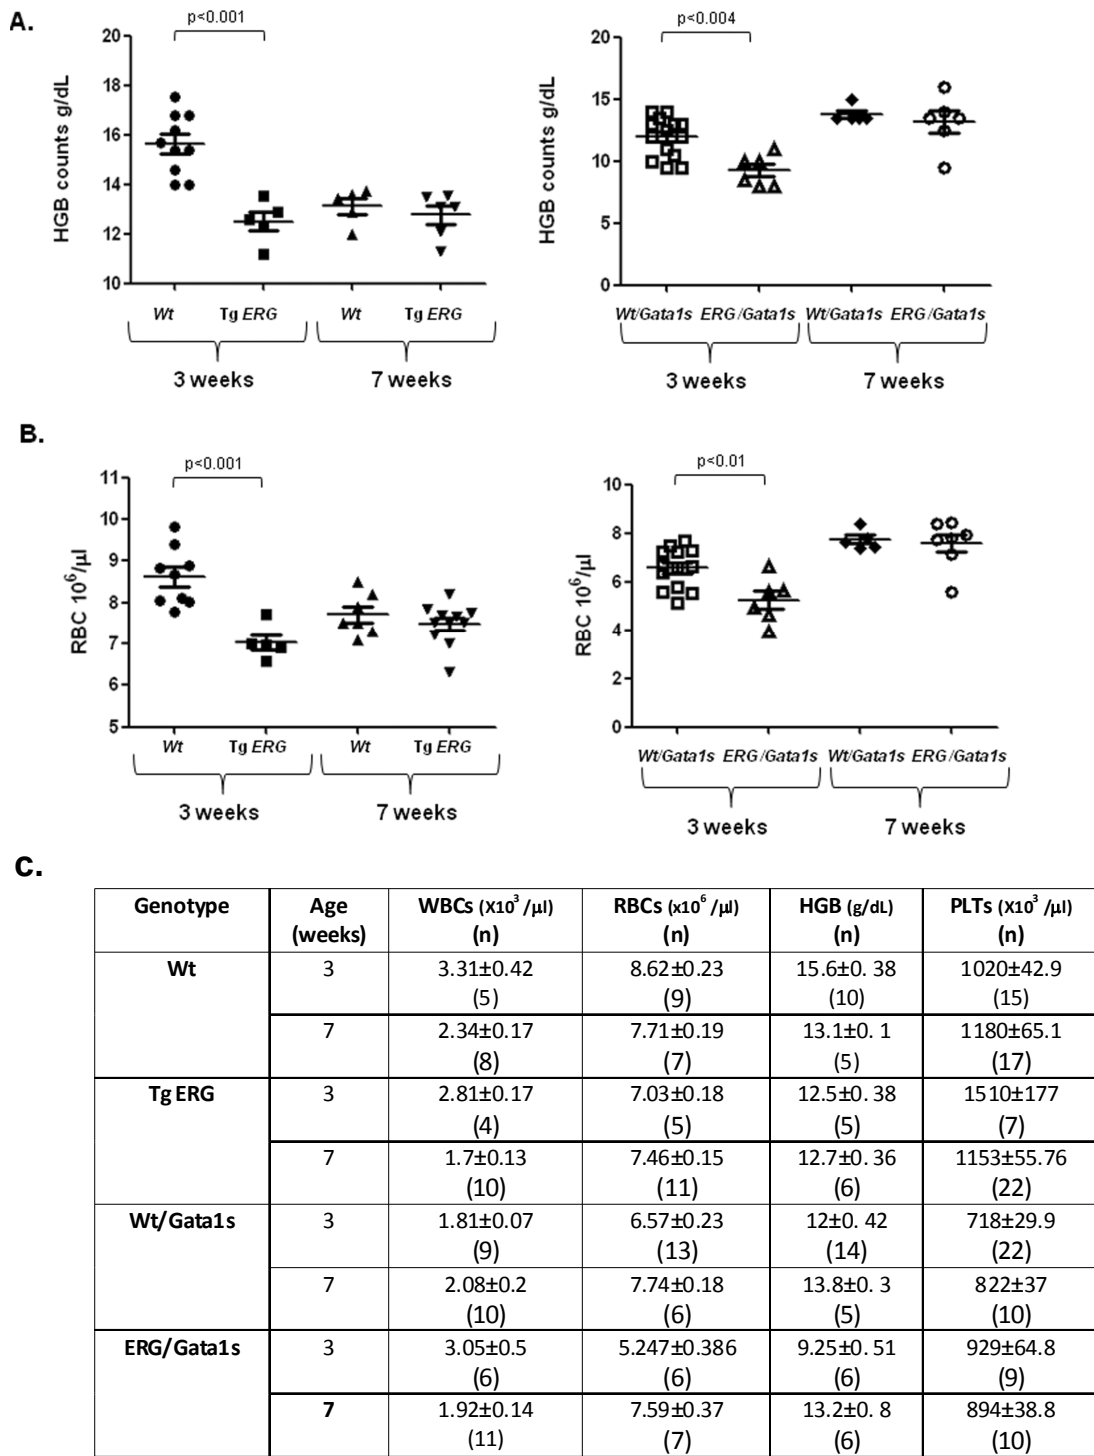

**Figure S4: Transient decrease in HGB and RBC in TgERG and ERG/Gata1s mice.** (A,B) Blood hemoglobin levels and red blood cell counts (RBC) were retrieved from males and females TgERG and ERG/Gata1s and their Wt and Wt/Gata1s littermates at the age of 3 and 7 weeks. n= at least 5 for each group. A significant difference between the groups was tested using Mann Whitney test. (C) Transient hematological abnormality in ERG/Gata1s mice.

**A.**

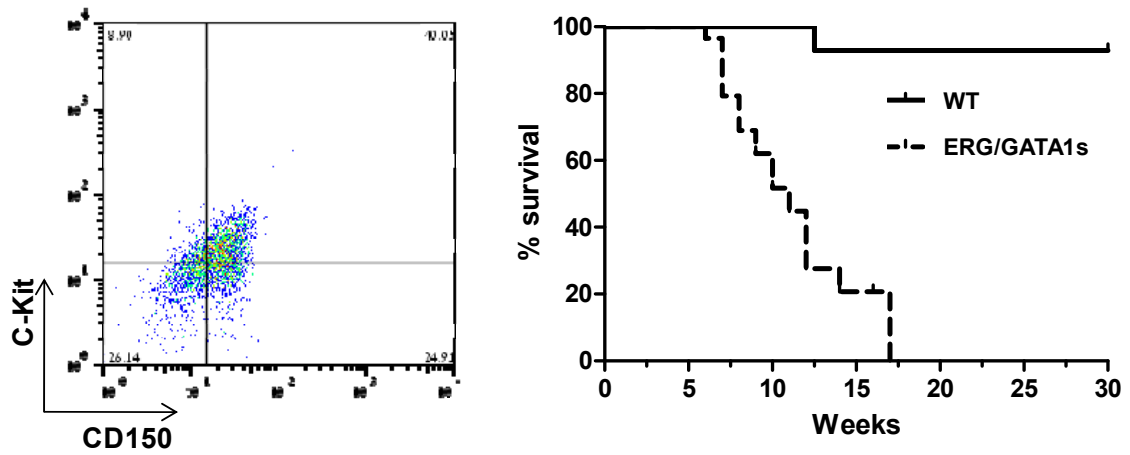

**Figure S5:** (A) Immunophenotype of cells extracted from the bone marrow of leukemic *ERG/Gata1s* mice shows MEP leukemia (B) Kaplan-Meier survival curve of *ERG/Gata1s* double transgenic mice with mega-erythroid progenitor leukemia.

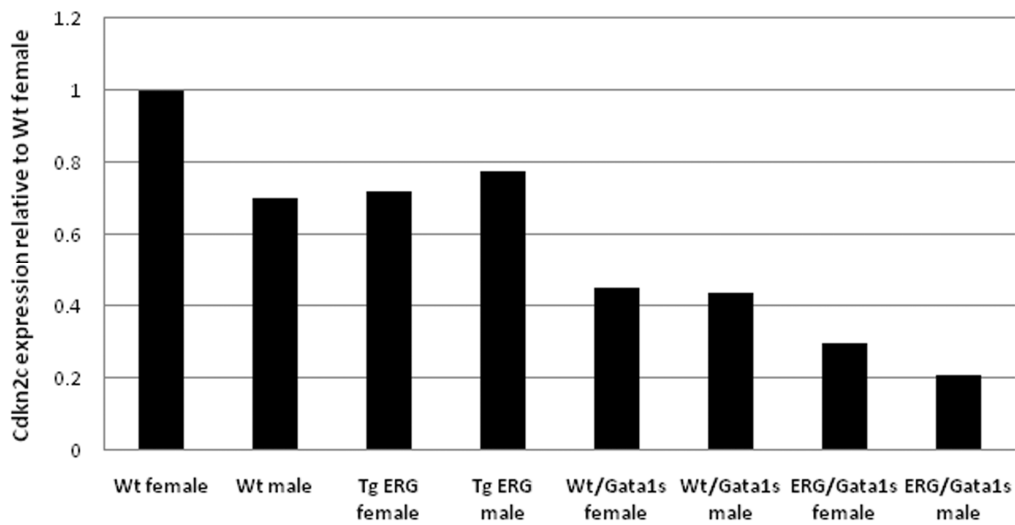

**Figure S6:** Expression of *Cdkn2c* according to expression array of different embryos at E14.5 presented as fold change compared to Wt female.

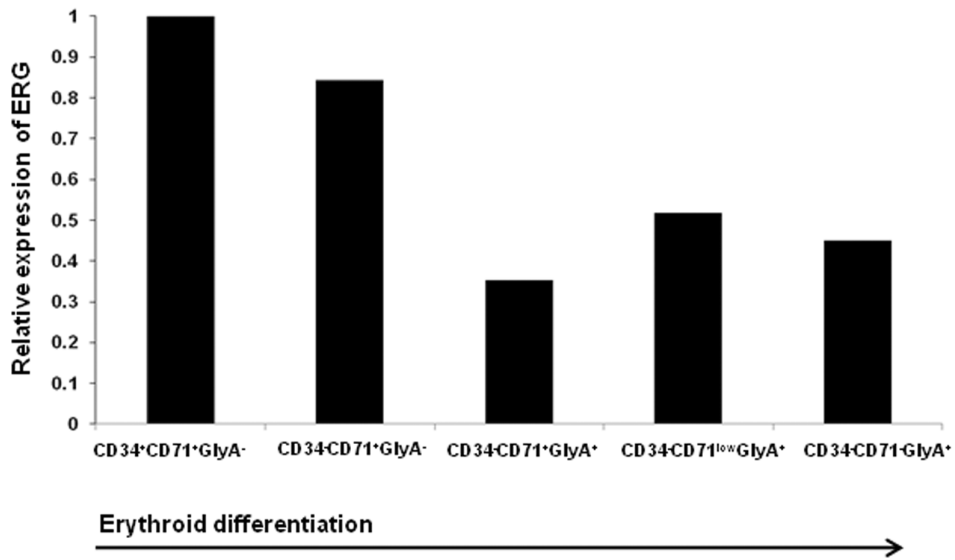

**Figure S7:** Expression of *ERG* in erythroid cells at different stages of erythroid differentiation. *ERG* expression was obtained from expression data published by Novershtern et al.

**Table 1: Genes involved in megakaryocyte development and platelet production**

| <b>Top up regulated genes common with Wt/Gata1s and ERG/Gata1s</b>        | <b>Relative expression in Wt/Gata1s</b> | <b>Relative expression in ERG/Gata1s</b> |
|---------------------------------------------------------------------------|-----------------------------------------|------------------------------------------|
| Dock8                                                                     | 3.57607                                 | 2.79747                                  |
| Maff                                                                      | 1.51034                                 | 2.05926                                  |
| Klc2                                                                      | 1.45748                                 | 1.49197                                  |
| Gata2                                                                     | 1.43844                                 | 4.3198                                   |
| Prkar2a                                                                   | 1.20537                                 | 1.40004                                  |
| Vps45                                                                     | 1.20301                                 | 2.01897                                  |
| Dock10                                                                    | 1.16974                                 | 1.54411                                  |
| Kif15                                                                     | 1.13532                                 | 1.51522                                  |
| Irf1                                                                      | -1.14                                   | 2.88013                                  |
| <b>% of up regulated genes from all the common genes in the two lists</b> | <b>57%</b>                              | <b>72%</b>                               |
| <b>Average up regulation compare to Wt FL</b>                             | <b>1.6</b>                              | <b>2.2</b>                               |

The gene set was taken from the Broad institute's molecular signature database (MSigDB)

[http://www.reactome.org/cgi-bin/eventbrowser\\_st\\_id?ST\\_ID=REACT\\_24970](http://www.reactome.org/cgi-bin/eventbrowser_st_id?ST_ID=REACT_24970)

The mice expression data is from male FL gene expression array compared to the expression measured in Wt male FL.

**Table 2: Early erythroid Genes**

| Top genes common with Wt/Gata1s                                             | Wt/Gata1s    | Top genes common with ERG/Gata1s | ERG/Gata1s   |
|-----------------------------------------------------------------------------|--------------|----------------------------------|--------------|
| Ccnb1ip1                                                                    | -10.8746     | Ccnb1ip1                         | -10.2413     |
| Igll1                                                                       | -1.85324     | Pnpo                             | -2.97343     |
| Fancl                                                                       | -1.75817     | Aldh1b1                          | -2.70771     |
| Rps2                                                                        | -1.60429     | Hspd1                            | -2.47848     |
| Acyp1                                                                       | -1.56343     | Fancl                            | -2.3628      |
| Ptdss2                                                                      | -1.52625     | Ptdss2                           | -2.27928     |
| Dut                                                                         | -1.48067     | Igll1                            | -2.27883     |
| Meis2                                                                       | -1.45861     | Rad51c                           | -2.25521     |
| Rfc4                                                                        | -1.43378     | Rfc4                             | -2.21108     |
| Epor                                                                        | -1.42643     | Ndufaf1                          | -2.19908     |
| Hspd1                                                                       | -1.41828     | Slc36a2                          | -2.19898     |
| Rragd                                                                       | -1.39766     | Slc39a8                          | -2.10132     |
| Rad51c                                                                      | -1.39433     | Rragd                            | -2.09898     |
| Gsta4                                                                       | -1.38842     | Rps2                             | -2.08482     |
| Pls3                                                                        | -1.38747     | Fam46a                           | -2.03105     |
| <b>% of down regulated genes from all the common genes in the two lists</b> | <b>47%</b>   |                                  | <b>51%</b>   |
| <b>Average down regulation compare to WT FL</b>                             | <b>-1.34</b> |                                  | <b>-1.63</b> |

The gene sets are from Novershtern et al. The mice expression is from male FL expression array compared to the expression measured in Wt male FL.



**Table 3: Late Erythroid genes**

| <b>Top genes common with Wt/Gata1s</b>                                      | <b>Wt/Gata1s</b> | <b>Top genes common with ERG/Gata1s</b> | <b>ERG/Gata1s</b> |
|-----------------------------------------------------------------------------|------------------|-----------------------------------------|-------------------|
| Hspa1a                                                                      | -3.52824         | Runx1t1                                 | -4.76153          |
| Runx1t1                                                                     | -1.68614         | Txnrd2                                  | -2.15999          |
| Spsb3                                                                       | -1.35741         | Jhdm1d                                  | -2.11134          |
| Rab11b                                                                      | -1.29556         | Spsb3                                   | -2.06049          |
| Txnrd2                                                                      | -1.27664         | Bbs7                                    | -2.04031          |
| Dsp                                                                         | -1.23163         | Hspa1a                                  | -1.89836          |
| Zc3hav1                                                                     | -1.20186         | Ppp1r15a                                | -1.62573          |
| Ngrn                                                                        | -1.19205         | Itih2                                   | -1.59876          |
| Jhdm1d                                                                      | -1.12114         | E2f2                                    | -1.55614          |
| Whsc111                                                                     | -1.11692         | Gldc                                    | -1.51384          |
| Pcmd2                                                                       | -1.06184         | Ngrn                                    | -1.44961          |
| Cpm                                                                         | -1.04604         | Rab11b                                  | -1.344            |
| E2f2                                                                        | -1.03634         | Hif1an                                  | -1.26584          |
| Fam134c                                                                     | -1.01899         | Cpm                                     | -1.24262          |
| Polr2k                                                                      | -1.01383         | Whsc111                                 | -1.22018          |
| <b>% of down regulated genes from all the common genes in the two lists</b> | <b>61%</b>       |                                         | <b>79%</b>        |
| <b>Average down regulation compare WT FL</b>                                | <b>-1.3</b>      |                                         | <b>-1.6</b>       |

The gene sets are from Novershtern et al. The mice expression is from male FL expression array compared to the expression measured in Wt male FL.

## Supplemental methods

### Primer sets used for the real time quantitative PCR:

Mpl F: TCAAGAGACCTGCTACCAG;

Mpl R: CACCGAGAGATGGCTCCA;

Pcam1 F: CTCCACTTCTGAACTCCAACAGC;

Pcam1 R: GTATTCTACATCCATGTTCTGG;

Mycn F: GAGAGGATACCTTGAGCGACTC;

Mycn R: GAACGTCTCTTCTCTACGGTG;

Mcl1 F: CTTGTAAGGACGAAACGGGAC;

Mcl1 R: CAGCAGCACATTTCTGATGC;

Epor F: CTCATTCTGGTCCTCATCTCG;

Epor R: GTGGTGAAGAGACCCTCAAACCTCGCTCTCTG;

Gata2 F: GCTCTACCACAAGATGAATGGACAG;

Gata2 R: CATAAGGTGGTGGTTGTCGTC;

Ter119 F: CTGTAGGTAACCCAAATCAGC;

Ter119 R: GCAGCAGACACTTCAGTAG;

Klf1 F: GGAAGAGCTACACCAAGAG;

Klf1 R: AGCGAACCTCCAGTCACAG;

Ldb1 F: CAACAGCAAGAAGAAGAGCCCAGC;

Ldb1 R: GTGATGAGCCTCTCGTCCTC;

Myb F: CATTACCAGGCACACAAGCGTC;

Myb R: CCAGTGGTTCTTGATAGC;

GATA1 F ex.1: CACTAAGGTGGCTGAATCCTC

GATA1 F ex.2: CTTGCCCCAGTTTGTGGATTC

GATA1 R ex.4: CTCCACAGTTCACACACTCTC

ERG F: GAGTACAGACCATGTGCGG

ERG R: AGCCTCTGGAAGTCGTCC

## **Gene expression profiling**

Experiments were performed using Affymetrix Mouse gene 1.0 ST oligonucleotide arrays (Affymetrix, Santa Clara, CA). Total RNA prepared from pulled embryos ( $n > 3$ ), from each sample was used to prepare biotinylated target DNA, according to manufacturer's recommendations. Briefly, 100 ng of Total RNA was used to generate first-strand cDNA by using a T7-random hexamer primer. After second-strand synthesis, in vitro transcription was performed. The resulting cRNA is then used for a second cycle of first-strand cDNA by using a T7-random hexamer primer with UTP resulting in SS DNA used for fragmentation and terminal labeling. The target cDNA generated from each sample was processed as per manufacturer's recommendation using an Affymetrix GeneChip Instrument System. Briefly, spike controls were added to fragmented cDNA before overnight hybridization. Arrays were then washed and stained with streptavidin-phycoerythrin before being scanned on an Affymetrix GeneChip scanner. A complete description of these procedures is available at: <https://www.affymetrix.com/support/technical/manuals.affx>.

Quality control: The quality and amount of starting RNA was confirmed using an agarose gel or by Bioanalyser (Agilent). After scanning, array images were assessed by eye to confirm scanner alignment and the absence of significant bubbles or scratches on the chip surface. The signals derived from the array were assessed using various quality assessment metrics. Details of quality control measures can be found at:

[http://media.affymetrix.com/support/technical/whitepapers/exon\\_gene\\_arrays\\_ga\\_whitepaper.pdf](http://media.affymetrix.com/support/technical/whitepapers/exon_gene_arrays_ga_whitepaper.pdf).

Data analysis: Gene level RMA sketch algorithm (Affymetrix Expression Console and Partek Genomics Suite 6.6) was used for crude data generation.

Differentially expressed genes were filtered as changed by at least 2 fold. Genes were filtered and analyzed using unsupervised hierarchical cluster analysis (Spotfire DecisionSite for Functional Genomics; Somerville, MA) to obtain a first assessment of the data. Further processing including functional analysis was performed using Ingenuity pathway analysis software (Ingenuity systems, see Ingenuity networks and function supplemental file).
